# Supplementary material
Source: Springer Nature journal article supplement (https://www.springermedizin.de/resource/supplementary/12959_2012_163_MOESM2_ESM.pdf/9569196)
Supplement: MOESM2 [file 9569196]

91917/11

S (188 54)  
52244 2 17  
167 50mm  
FFFF  
+0 00  
( 256,231)

2011 11 20  
120kV/ 187mAs  
0.75s/5.0mm/1.0x16  
15.00mm/r  
HP15.0

R

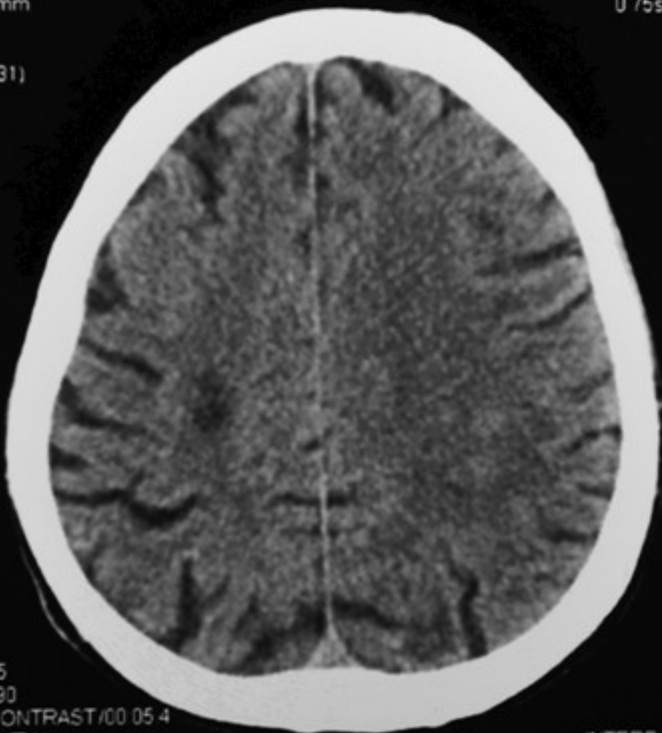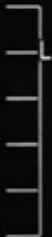

WL= 35  
WW= 90  
NON CONTRAST/00 05 4  
DR DW/TW  
**Activion16**

962903  
WD 41  
M

SUI/HF/VFF  
INTERP.5/FC63/ODS+/  
NATIONAL HOSPITAL OF SRI LANKA
